# Supplementary material
Source: PubMed Central journal article supplement (PMC5866358)
Supplement: suppl-figs.pdf [file suppl-figs.pdf]

APPENDIX

PANCREATIC  $\beta$ -CELL ELECTRICAL ACTIVITY  
AND INSULIN SECRETION: OF MICE AND MEN

Patrik Rorsman<sup>1,2</sup> and Frances M Ashcroft<sup>3</sup>

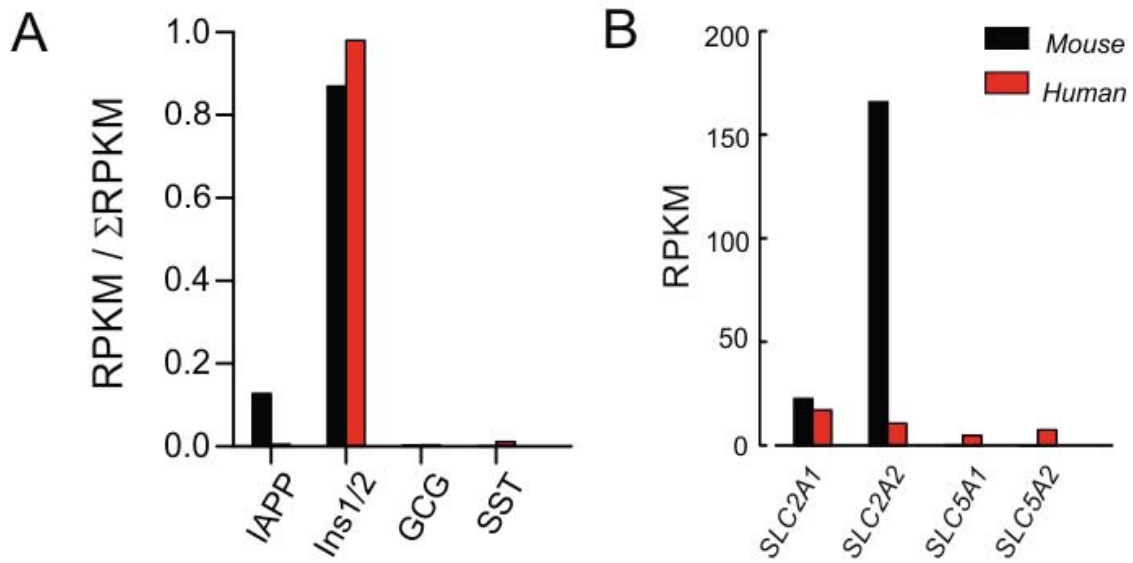

**FIGURE 1.** Expression analysis of hormones (A) and glucose transporters in mouse and human  $\beta$ -cells. Values here and in subsequent figures are means of published RNAseq data in mouse (3, 147) and human (69, 480)  $\beta$ -cells. RPKM indicates Reads Per Kilobase of transcript per Million mapped reads. Note that the  $\beta$ -cell fractions were obtained by fluorescence-activated cell sorting and were devoid of any mRNA for glucagon or somatostatin but contain low levels of *IAPP*. For clarity, only human gene names (i.e. in upper case italics) are given.

*APPENDIX*

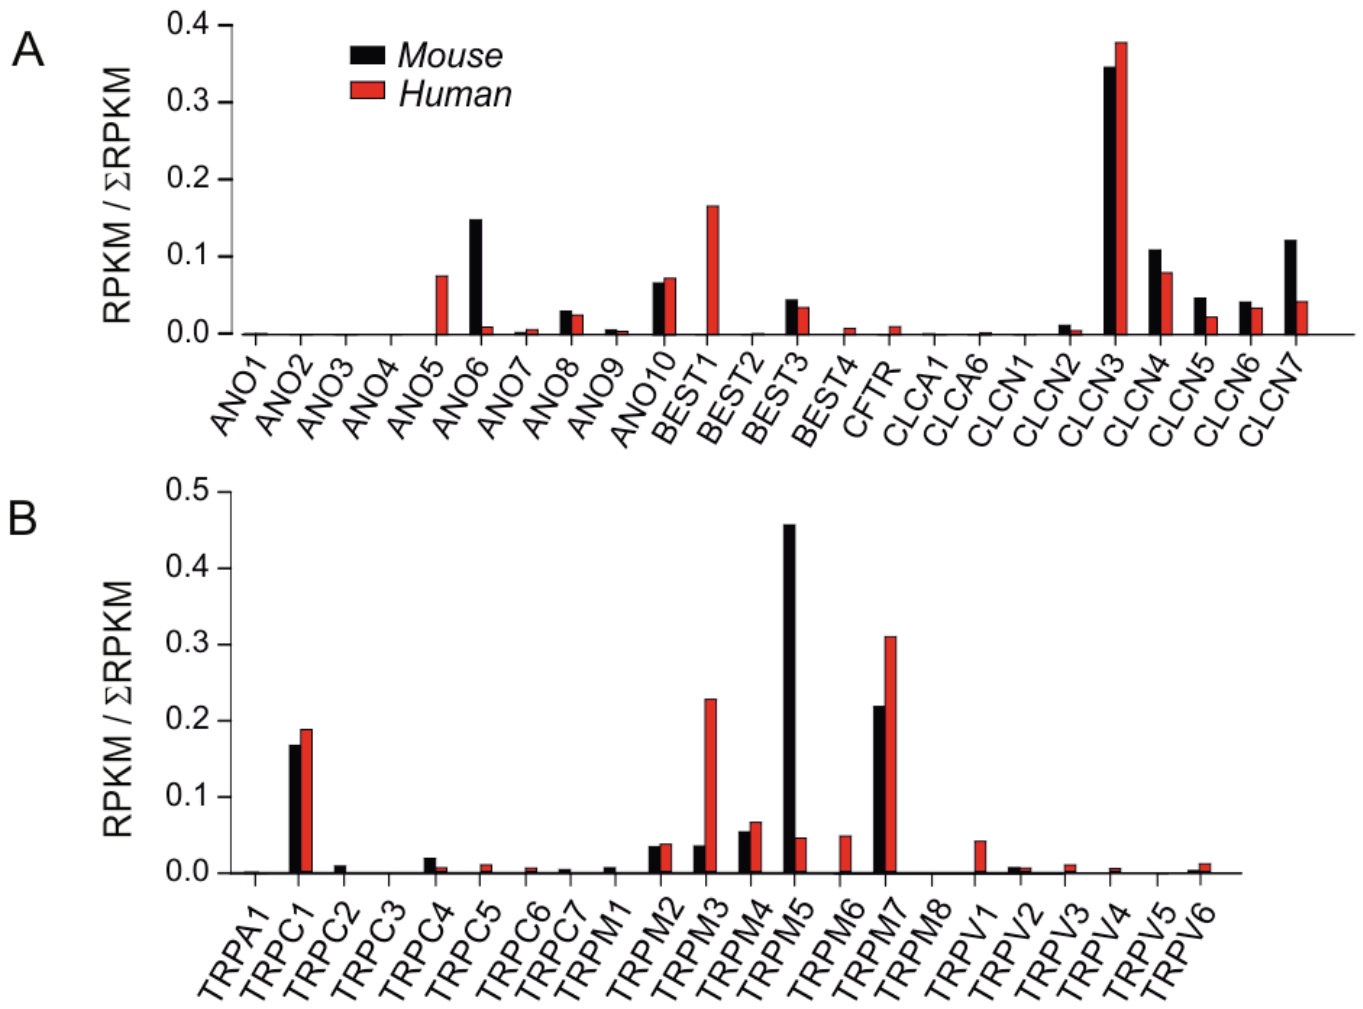

Figure 2. A: Relative expression of Cl<sup>-</sup> channels in mouse and human β-cells. Data are expressed relative to the sum of all genes displayed (i.e. RPKM/ΣRPKM). B: As in A but showing data for Trp channels.

*APPENDIX*

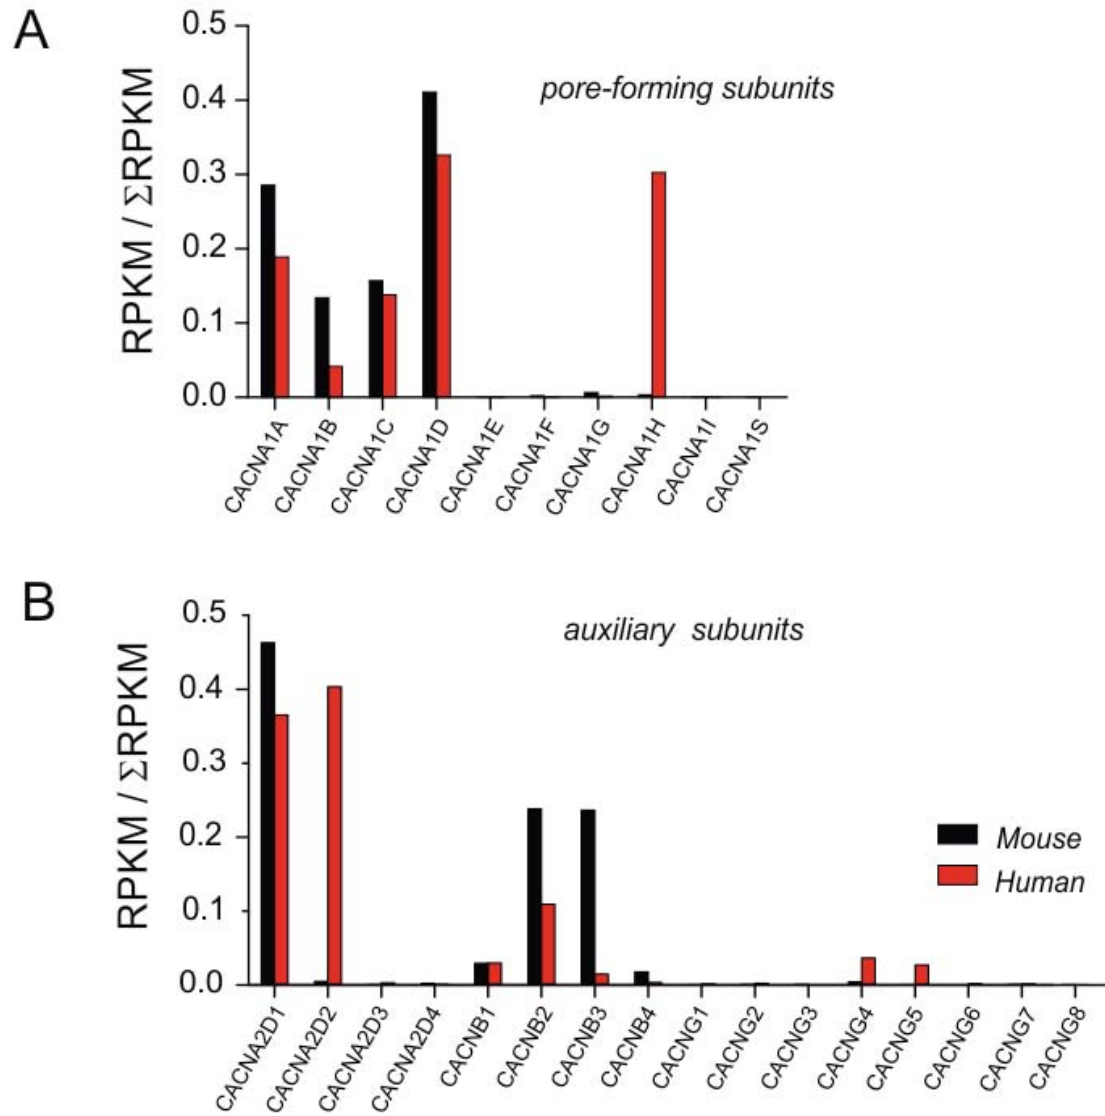

**Figure 3.** A-B: Relative expression of the pore-forming  $\text{Ca}^{2+}$  channel  $\alpha$ -subunits (*CACNA1x*) (A) or auxiliary  $\alpha_2\delta$  (*CACNA2D*),  $\beta$ - (*CACNBx*) and  $\gamma$ - (*CACNGx*) subunits (where x stands for a letter or number) (B).

APPENDIX

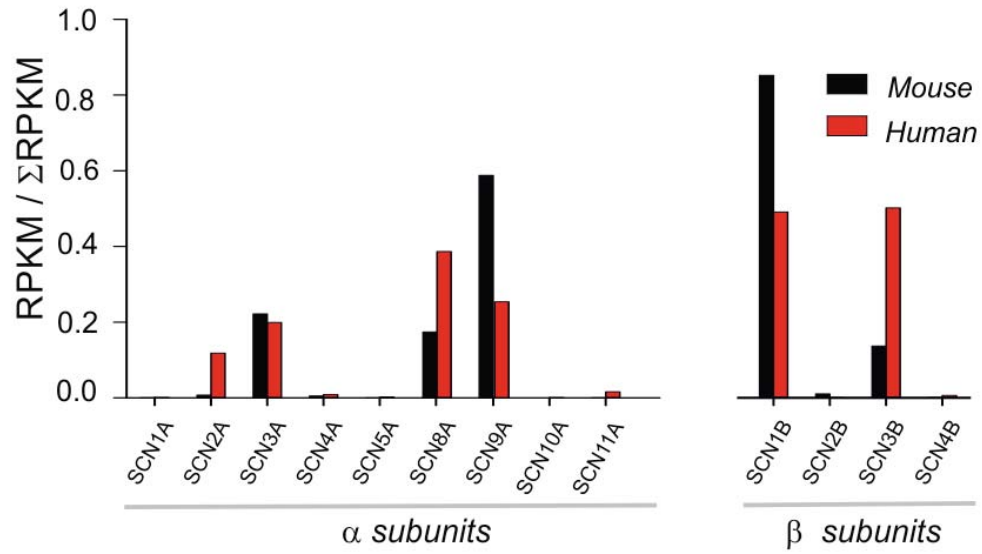

Figure 4. A-B: Relative expression of the pore-forming Na<sup>+</sup> channel α-subunits (SCNxA) (Left) and auxiliary β-subunits (SCNx B) (Right). Note that the numbering of the proteins (Nav1.1-Nav1.9) and genes (SCN1A-11A) do not correspond.

APPENDIX

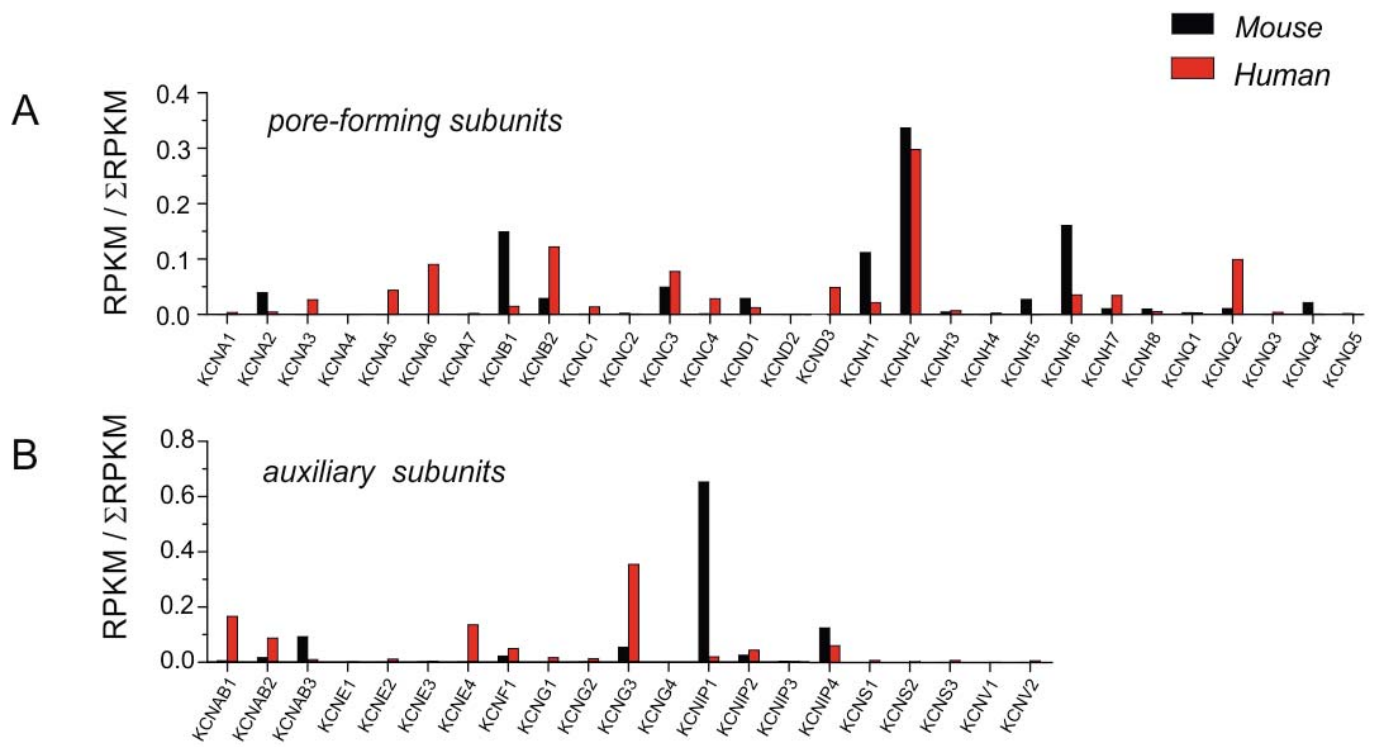

Figure 5. A-B: Relative expression of the pore-forming (A) or auxiliary subunits (B) of voltage-gated  $K^+$  channels in mouse and human  $\beta$ -cells.

APPENDIX

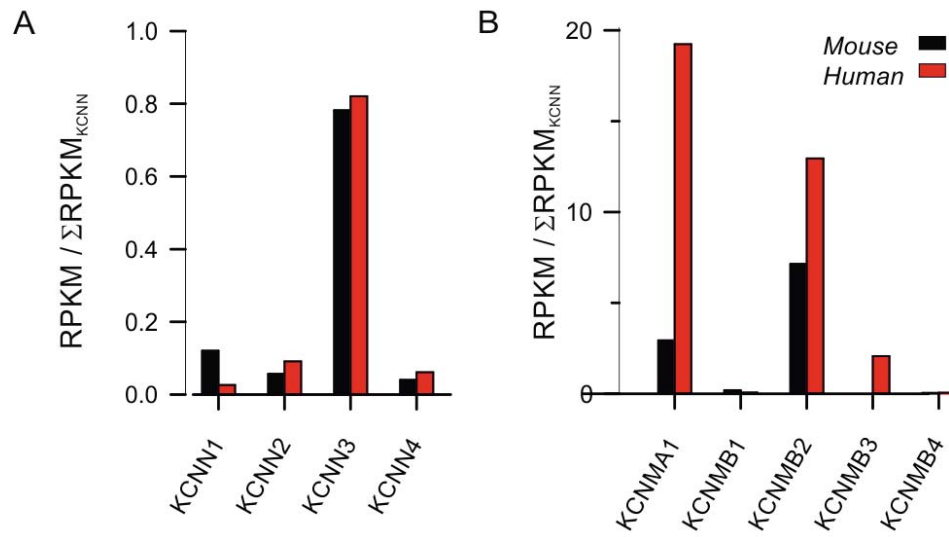

Figure 6. Relative expression of small- (A) and large-conductance (B) Ca<sup>2+</sup>-activated K<sup>+</sup> channels (*KCNNx* and *KCNMx*). Expression has been normalized to the aggregate expression of all *KCNNs* ( $\Sigma$ RPKM<sub>KCNN</sub>).

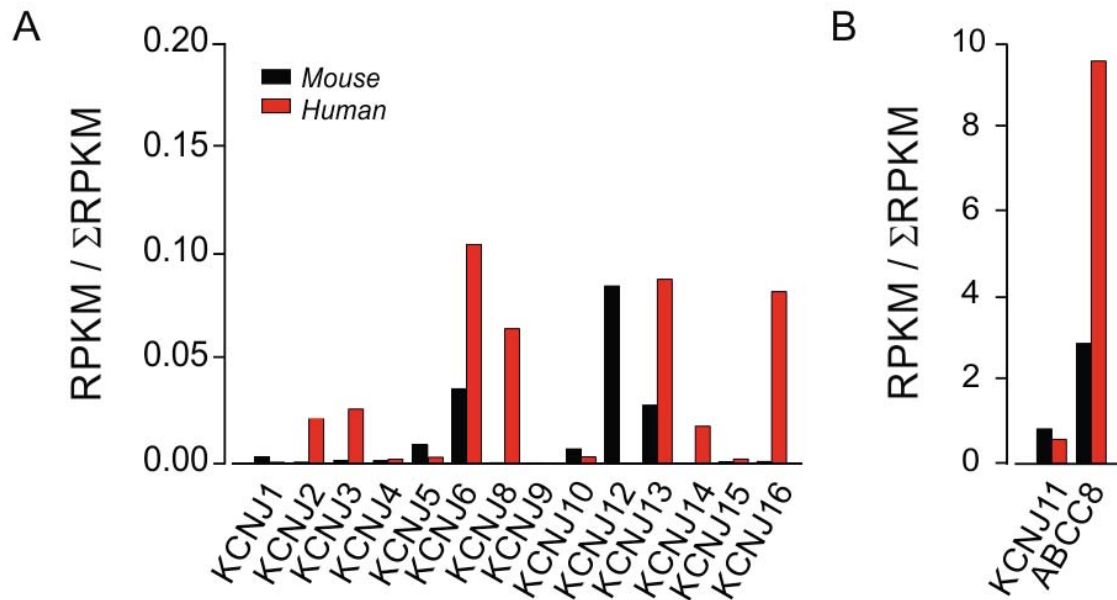

Figure 7. A: Relative expression of inwardly rectifying K<sup>+</sup> channels (*KCNJx*). Expression has been normalized to the aggregate expression of all *KCNJs* ( $\Sigma$ RPKM<sub>KCNJ</sub>). B: Expression of SUR1 (*ABCC8*, likewise normalized to  $\Sigma$ RPKM<sub>KCNJ</sub>). Note that the expression of *KCNJ11* and *ABCC8* is displayed using a different ordinate scale than the other *KCNJs*.



APPENDIX

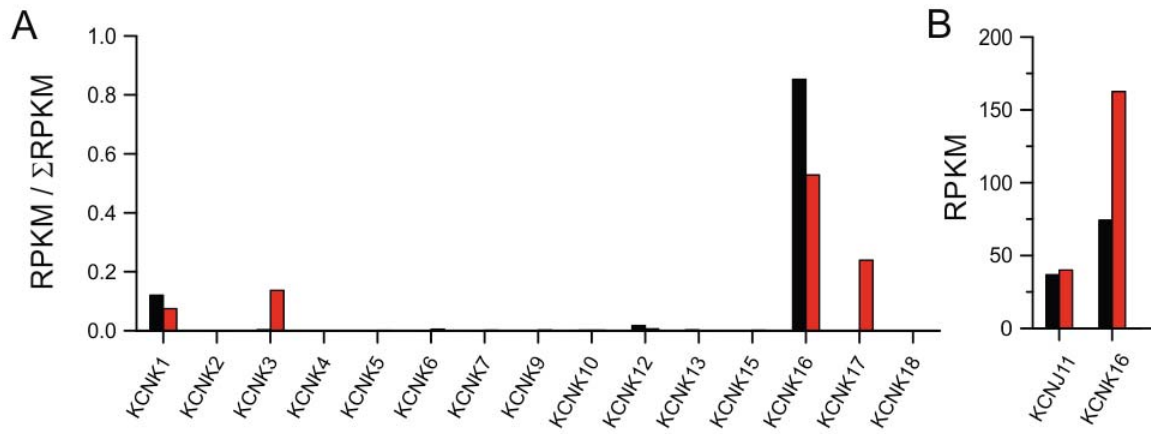

Figure 8. A: Relative expression of two-pore K<sup>+</sup> channels (*KCNKx*). Expression has been normalized to the aggregate expression of all *KCNKs* ( $\Sigma$ RPKM). B: Comparison of *KCNK16* expression with *KCNJ11* (values in RPKM).

APPENDIX

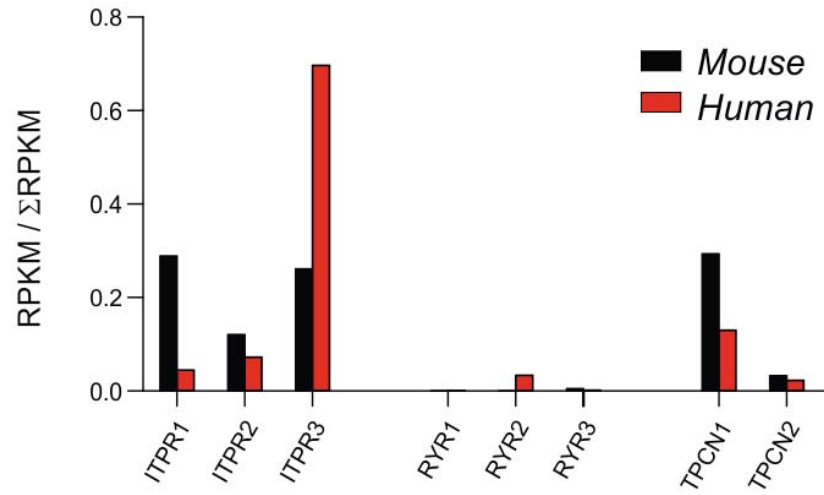

Figure 9. Relative expression of the intracellular ion channels: ryanodine receptors ((*RYRx*), InsP<sub>3</sub> receptors (*ITPRx*) and two-pore channels (*TPCNx*).

APPENDIX

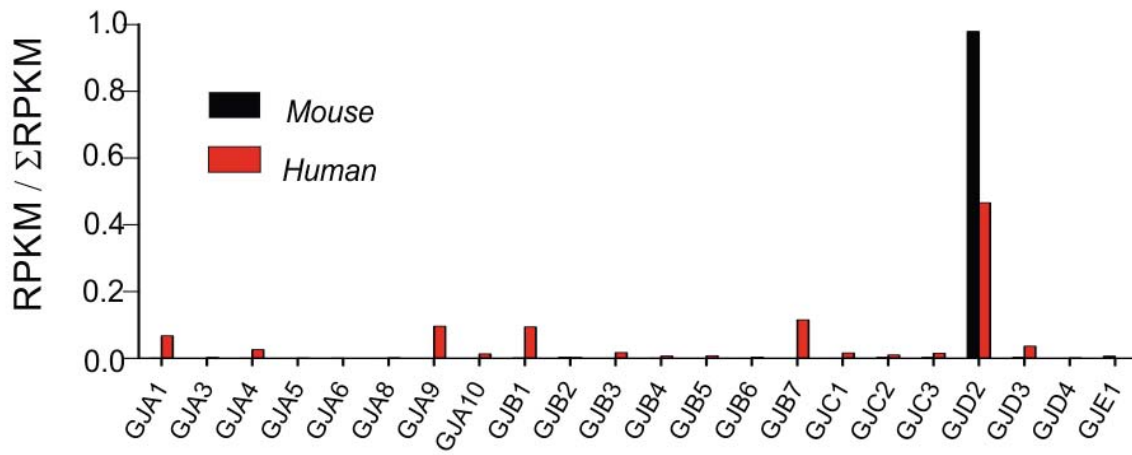

Figure 10. Relative expression of *GJAs*, *GJBs*, *GJCs* and *GJDs*.

APPENDIX

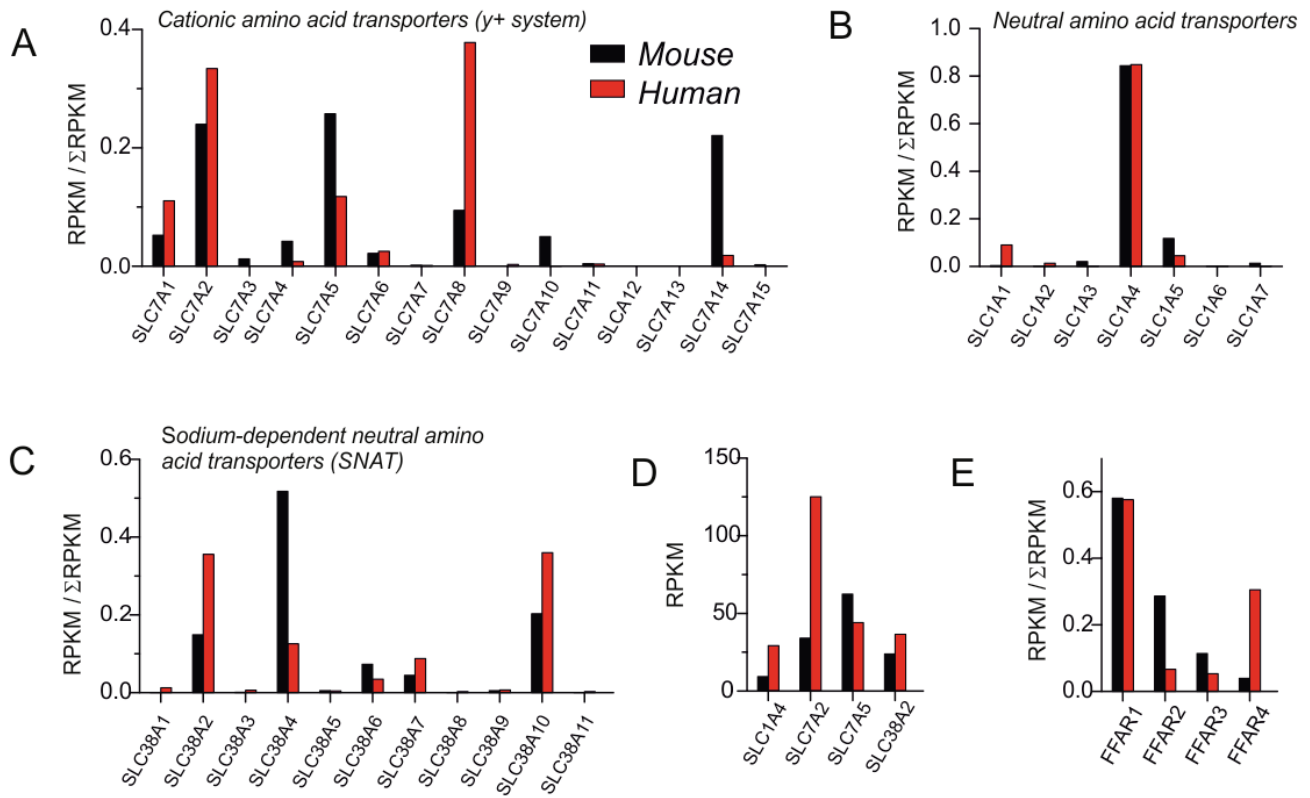

**Figure 11.** A: Relative expression of cationic amino acid transporters ( $y^+$  system) in mouse and human  $\beta$ -cells. *SLC7A14* mediates uptake of cationic amino acids into lysosomes and may not be important for generation of electrical activity. Human and mouse  $\beta$ -cells express high levels of *SLC7A5* and *SLC7A8*, which is believed to transport neutral amino acids when associated with *SLC3A2*. B: As in A, but showing expression of neutral amino acid transporters. C: As in A, but displaying expression of  $\text{Na}^+$ -dependent neutral amino acid transporters (SNATs). In addition to the high expression of *SLC38A2* and *A4*, both mouse and human  $\beta$ -cells also express the putative neutral amino acid transporter *SLC38A10*. D: Absolute expression (in RPKM) of *SLC1A4*, *SLC7A2*, *SLC7A5* and *Slc38A2* in mouse and human  $\beta$ -cells analyzed as described in legend to Figure 2D. E: Relative expression of free fatty acid receptors (FFARs) in mouse and human  $\beta$ -cells.

APPENDIX

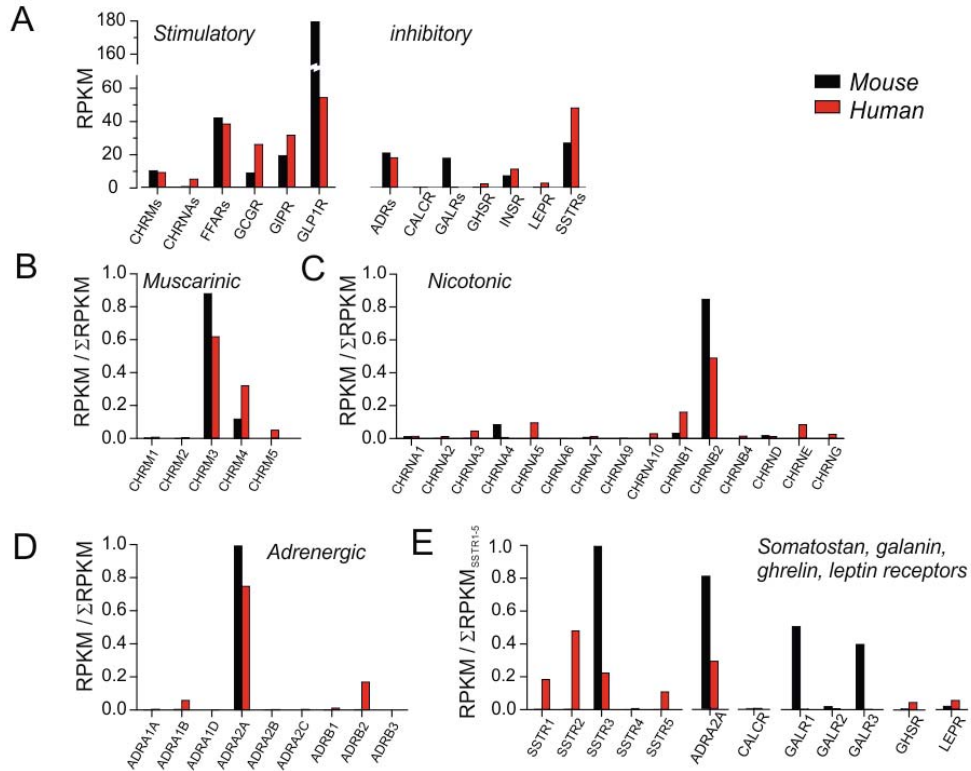

**Figure 12.** A: Expression (in RPKM) of receptors for stimulatory and inhibitory agonists. Abbreviations: *CHRM*s, cholinergic receptors muscarinic; *CHRNA*s, cholinergic receptor nicotinic  $\alpha$ -subunit; *FFAR*s, free fatty acid receptors; *ADR*s, adrenergic receptors; *GALR*s, galanin receptors; *INSR*, insulin receptor; *SSTR*s, somatostatin receptors. B: Relative expression of muscarinic receptors (*CHRM*<sub>x</sub>). C: As in B but showing relative expression of nicotinic receptor  $\alpha$ - (*CHRNA*<sub>x</sub>),  $\beta$ - (*CHRNA*<sub>x</sub>),  $\delta$ - (*CHRNA*<sub>x</sub>),  $\epsilon$ - (*CHRNA*<sub>x</sub>) and  $\gamma$ - (*CHRNA*<sub>x</sub>) subunits. Note that expression of *Chrn*s is very low in mouse  $\beta$ -cells so the functional significance of *Chrna4* is uncertain. D: As in B but showing relative expression of adrenergic  $\alpha_1$ - (*ADRA1*<sub>x</sub>),  $\alpha_2$ - (*ADRA2*<sub>x</sub>) and  $\beta$ -receptors (*ADRB*<sub>x</sub>). E: Relative expression of somatostatin (*SSTR*<sub>x</sub>),  $\alpha_2$  (*ADRA2A*), galanin (*GAL*<sub>x</sub>), ghrelin (*GHSR*) and leptin (*LEPR*) receptors normalized to the aggregate expression of the *SSTR*s ( $\Sigma$ RPKM<sub>SSTR1-5</sub>).

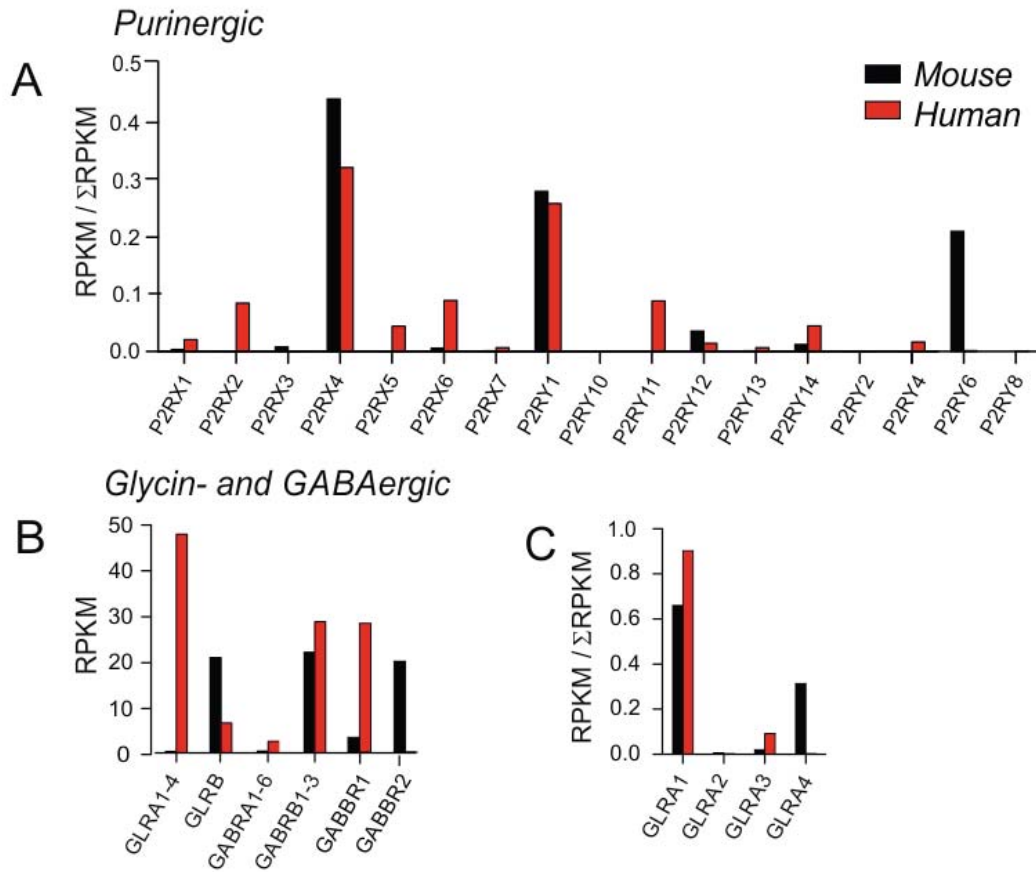

Figure 13. A: Relative expression of ionotropic ( $P2RXx$ ) and metabotropic ( $P2RYx$ ) purinergic receptors in mouse and human  $\beta$ -cells. B: Comparison of expression (in RPKM) of glycine receptor  $\alpha$ - ( $GLRAx$ ) and  $\beta$ -subunits ( $GLRB$ ), ionotropic GABA<sub>A</sub>  $\alpha$ - ( $GABRA1-6$ ) and  $\beta$ -subunits ( $GABRB1-3$ ) and metabotropic GABA<sub>B</sub> ( $GABRBx$ ) receptors. Note that mouse  $\beta$ -cells are almost devoid of GABA<sub>A</sub> receptors. C: As in A, but showing relative expression of glycine receptor  $\alpha$ -subunits ( $GLRAx$ ) normalized to the aggregate expression of  $GLRAs$ .

Glutamatergic

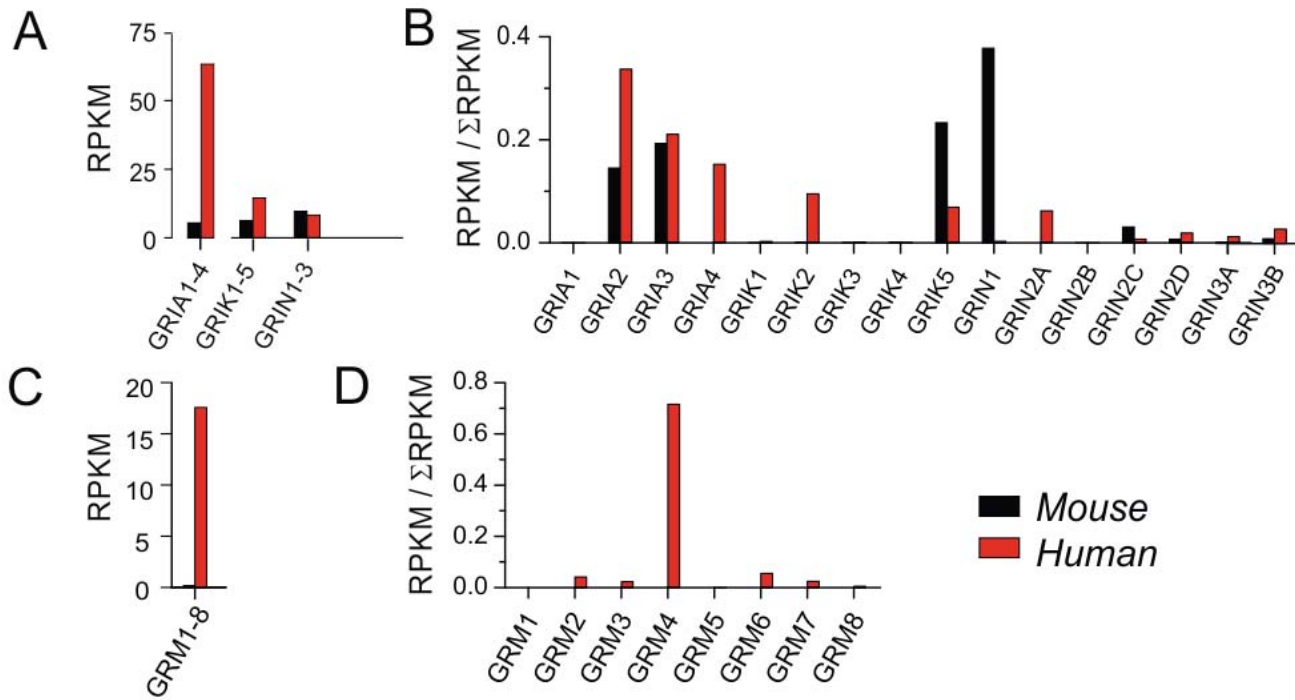

Figure 14. A: Comparison of expression (in RPKM) of AMPA (*GRIA1-4*), kainate (*GRIK<sub>x</sub>*) and NMDA (*GRIN<sub>x</sub>*)-subunits. B: Relative expression of *GRIA<sub>x</sub>*, *GRIK<sub>x</sub>* and *GRIN<sub>x</sub>* normalized to aggregate expression of all ionotropic glutamate receptors. C: As in B but comparing expression of metabotropic glutamate receptors (*GRM<sub>x</sub>*) in mouse and human  $\beta$ -cells. Note very low expression of *GRIMs* in mouse  $\beta$ -cells. D: As in B but showing relative expression of *GRM<sub>x</sub>* in human  $\beta$ -cells (relative expression in mouse  $\beta$ -cells not shown because of low expression).

*APPENDIX*

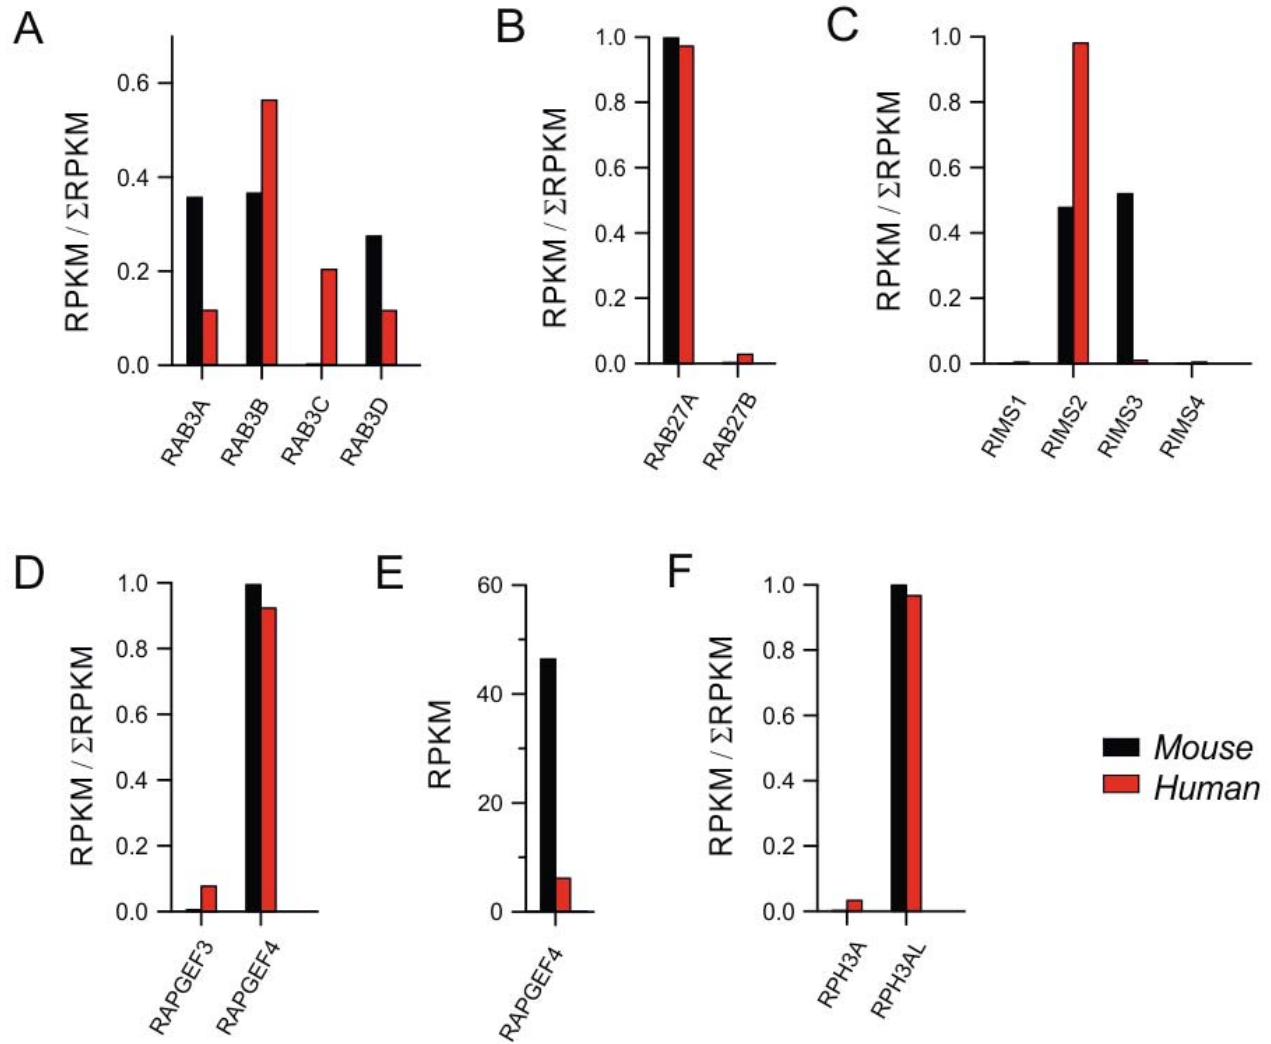

**Figure 15.** *A:* Relative expression of Rab3 (*RAB3x*) in mouse and human  $\beta$ -cells. *B:* As in *A* but showing Rab27 (*RAB27x*). *C:* As in *A* but showing RIM (*RIMx*). *D:* As in *A* but showing RAPGEFs (*RAPGEFx*). *E:* Comparison of expression (in RPKM) of *RABGEF4* in mouse and human  $\beta$ -cells. Note that expression in mouse  $\beta$ -cells is much higher than in human  $\beta$ -cells. *F:* As in *A* but showing relative expression of *RPH3A* and *RPH3AL*.



*APPENDIX*

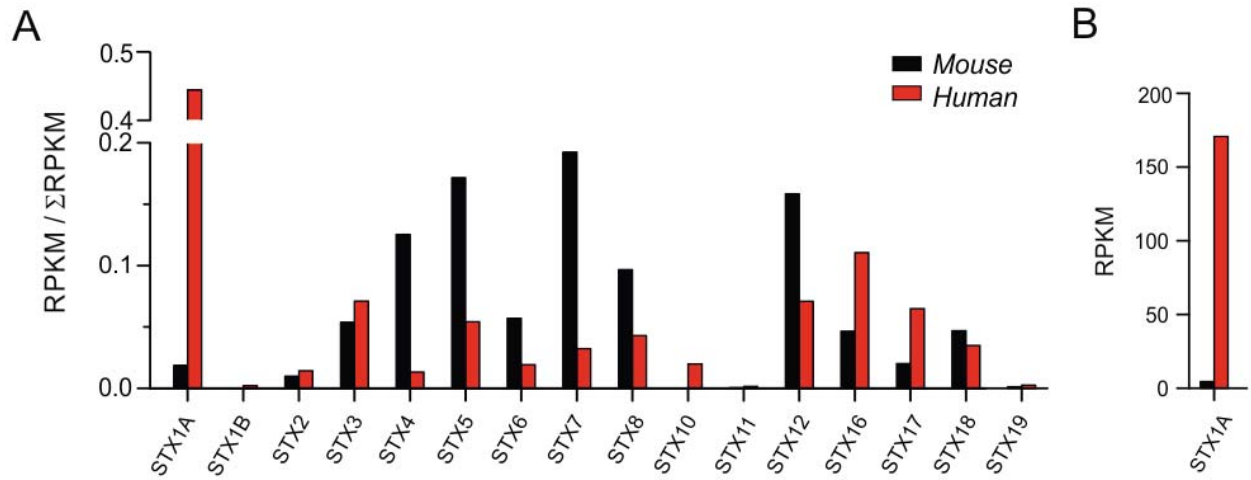

Figure 16. A: Relative expression of syntaxins (STXs) in mouse and human  $\beta$ -cells. B: Expression (in RPKM) of *STX1A* in mouse and human  $\beta$ -cells. Note the much higher expression in human than in mouse  $\beta$ -cells.

*APPENDIX*

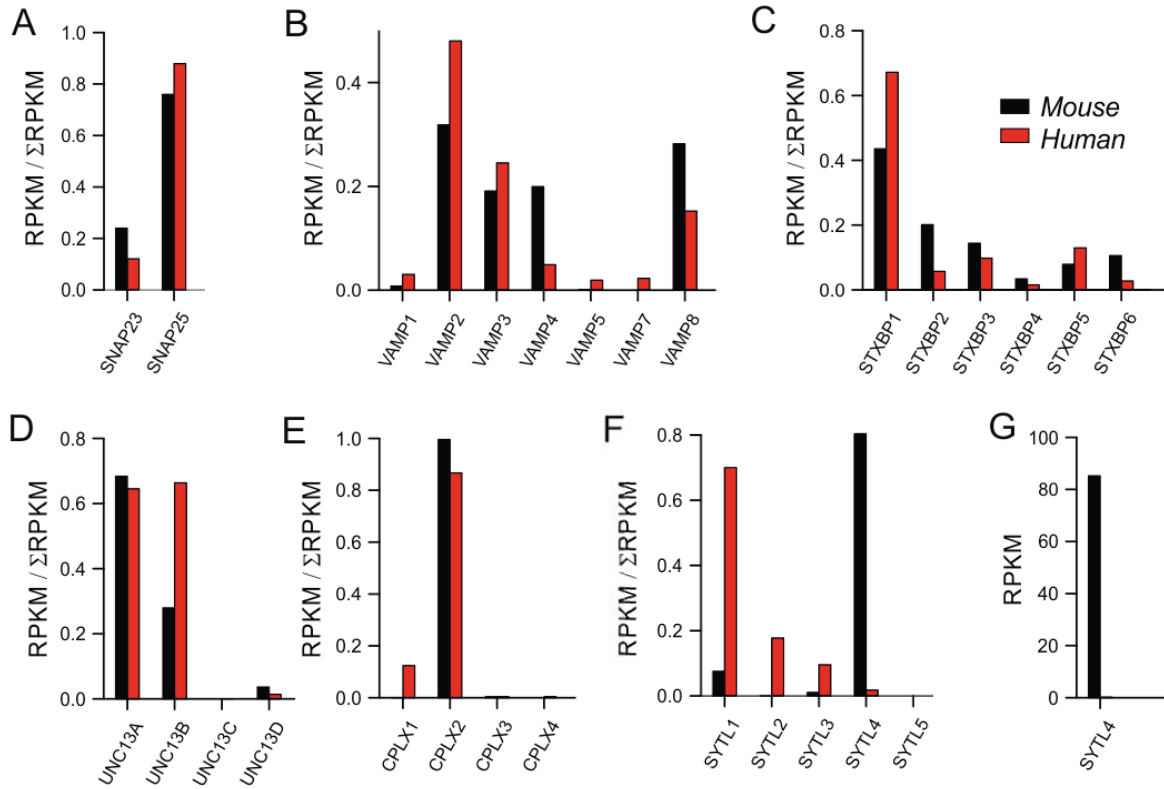

**Figure 17.** *A:* Relative expression of SNAP23 and 25 (*SNAPx*) in mouse and human  $\beta$ -cells. *B:* As in *A* but showing VAMPs (*VAMPx*). *C:* As in *A* but showing syntaxin-binding proteins (*STXBPx*). *D:* As in *A* but showing Munc13 (*UNC13x*). *E:* As in *A* but showing complexins (*CPLXx*). *F:* As in *A* but showing synaptotagmin-like proteins (*SYTLx*). *G:* Comparison of expression (in RPKM) of *SYTL4* in mouse (black) and human  $\beta$ -cells (red). Note absence of *SYTL4* in human  $\beta$ -cells.

APPENDIX

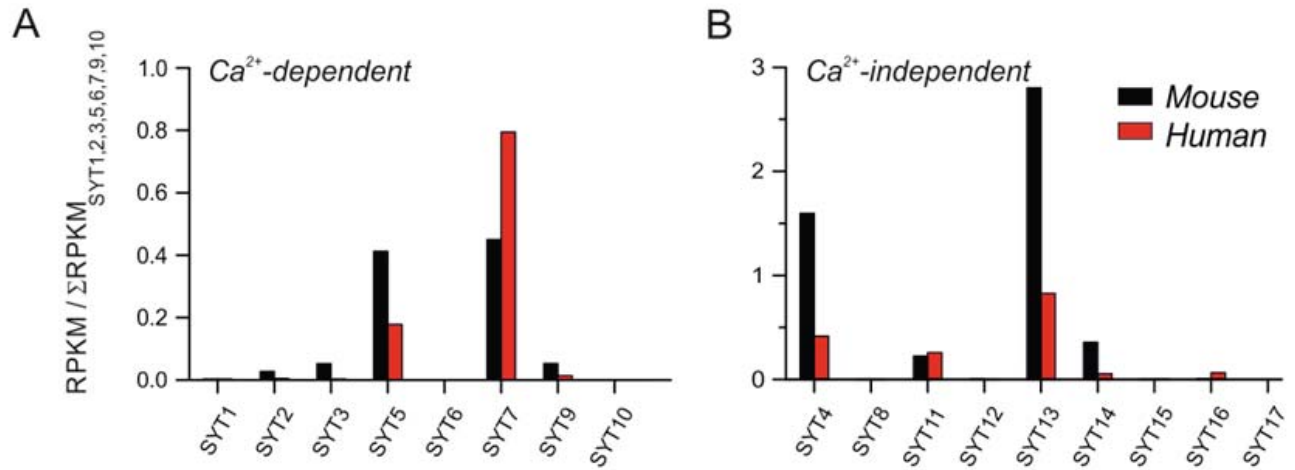

Figure 18. Relative expression of Ca<sup>2+</sup>-dependent (A) and -independent (B) synaptotagmins in mouse and human  $\beta$ -cells. Expression has been normalized to the summed expression of the Ca<sup>2+</sup>-dependent synaptotagmins (*SYT1*, *SYT2*, *SYT3*, *SYT5*, *SYT6*, *SYT7*, *SYT9*, *SYT10*). For display, the expression of the Ca<sup>2+</sup>-dependent and -independent SYTs (*right*) has been separated. Note the high expression of Ca<sup>2+</sup>-independent SYTs.
